# Supplementary material for: Anticancer Activity of Fascaplysin against Lung Cancer Cell and Small Cell Lung Cancer Circulating Tumor Cell Lines
Source: PubMed Central journal article supplement (PMC6213142; doi:10.3390/md16100383), 2018-10-14
Supplement: marinedrugs-16-00383-s001.pdf [file marinedrugs-16-00383-s001.pdf]

| Cell Line  | IC <sub>50</sub> Fascaplysin [μM] | SD   |
|------------|-----------------------------------|------|
| MDA-MB-231 | 0,61                              | 0,07 |
| MDA-MB-436 | 1,6                               | 0,1  |
| COV318     | 1,21                              | 0,05 |
| ME180      | 0,91                              | 0,11 |
| OVCAR3     | 0,52                              |      |
| SKBr3      | 0,48                              | 0,06 |
|            |                                   |      |
| NCI-H526   | 0,53                              | 0,06 |
| SCLC26A    | 1,48                              | 0,12 |
| S457       | 0,2                               | 0,03 |
| DMS53      | 1,17                              | 0,02 |
| DMS153     | 1,35                              | 0,23 |
| NCI-H69    | 1,05                              | 0,14 |
|            |                                   |      |
| A549       | 0,63                              | 0,11 |
| H1299      | 0,69                              | 0,12 |
| PC-9       | 0,99                              | 0,39 |
| BH295      | 2,04                              | 0,05 |
| IVIC-A     | 1,41                              | 0,33 |
|            |                                   |      |
| HEK293     | 1,6                               | 0,42 |
